# Supplementary material for: Neotectonics of Brazzaville and Kinshasa: linking Congo Basin seismicity and in situ stress in the Inkisi Group
Source: Copernicus journal article supplement (doi:10.5194/se-2020-162), 2020-10-05
Supplement: Supplementary file [file Review_SE-2020-162.pdf › Review_SE-2020-162.pdf]

**Reviewer Comments for manuscript “Neotectonics of Brazzaville and Kinshasa: linking Congo Basin seismicity and in situ stress in the Inkisi Group” as prepared by Hardy M.D. Nkodia, Timothée Miyouna, Damien Delvaux, Florent Boudzoumou, Nicy C. Bazebizanza Tchiguina**

In general this manuscript is well written and has information that is important for our understanding of the seismotectonics of the study area. Effort should be made to ensure it is published. Apart from the comments below I have also included most of my comments in the attached copy of the manuscript where comments are included using sticky notes and under highlighter text notes.

- Please make an effort to present your results according to the order presented in the methodology section. Otherwise modify the methodology to fit results.
- Present field data collected and used to determine paleo-stress.
- May you provide more information on the depth values presented with earthquakes table. On page 14 (last paragraph) you referred to average depth value of 9km, but it is about 10 km from the table apart from the observed deeper ones.
  - Are you confident about these depth values?
  - Did you calculate them during your data analysis?
  - How did you make sure you got reliable values or were these fixed by the USGS?
- There is no discussion of results presented in Table 2 (corrected table number). You need to present and discuss how those values were obtained.
  - How did you use the equation  $I = N+1/m$  to determine I and m?
  - What data did you use to do this?
  - You need to discuss and present the results in the text and their implications.
